# Research Waste in ME/CFS

Sonia Lee

*Sydney School of Public Health, University of Sydney, Australia*

---

## Abstract

**Objective:** To compare the prevalence of selective reporting in ME/CFS research areas: psychosocial versus cellular.

**Method:** A bias appraisal was conducted on three trials (1x psychosocial and 2x cellular) to compare risk of bias in study design, selection and measurement. The primary outcome compared evidence and justifications in resolving biases by proportions (%) and ORs (Odds Ratio); the secondary outcome determined the proportion (in %) of ME/CFS grants at risk of bias.

**Results:** NS (cellular study) was twice as likely to present evidence in resolving biases over PACE (psychosocial trial) (OR = 2.16; 65.6% vs 46.9%), but this difference was not significant ( $p = 0.13$ ). However, NS was five times more likely to justify biases over PACE (OR = 4.76; 46.9% vs 15.6%) and this difference was significant ( $p = 0.0095$ ;  $p < 0.05$ ). PACE was weak in place (operational aspects 32%) and NS for data practices (37%). The proportion of grants were more biased in evidence for PACE (72%) compared to NS (28%), and also more biased in justifications for PACE (86%) than NS (14%).

**Conclusion:** Psychosocial trials on ME/CFS are more likely to engage in selective reporting indicative of research waste than cellular trials. Improvements to place may help reduce these biases, whereas cellular trials may benefit from adopting more translatable data methods. However, these findings are based on two trials. Further risk of bias appraisals are needed to determine the number of trials required to make robust these findings.

*Keywords:* Research Waste, Selective Reporting, PACE, Chronic Fatigue Syndrome, Myalgic Encephalomyelitis, Clinical Trials, Research Integrity, Evidence-Based Medicine, E-utilities

---

## 1. Background

Research waste in clinical trials are seen in outcomes that are not published, or in selective reporting of incidental and spurious findings that cannot be reproduced or translated in practice. When outcomes are not published: resources are wasted, research is stilted, and the study protocol cannot be validated nor repudiated in future protocols. Reviews on publication rates indicate: 50% of randomised trials are not published (Kasenda *et al.*, 2014); 88% for cohort studies (Bogert *et al.*, 2015); and 50% for pre-clinical and clinical studies (Schmucker *et al.*, 2014). On the other hand, selective reporting is suspected when data is fabricated (intentionally misrepresented); or falsified (intentionally manipulated) in favour of a desired outcome. The potential causes of selective reporting include: poor recruitment, irrelevant endpoints, biased selection criteria and discontinuation, for instance: of 1017 RCTs, 25% were discontinued, and of those, 9.9% were discontinued due to poor recruitment (Kasenda *et al.*, 2014). When outcomes are not published, authors are contacted for missing data in instances of imputing data in unpublished trials (systematic review). However in selective reporting, even if the reported outcomes appear distinctly remarkable: *p* hacking (extremely good *p* values); file drawer problem (only positive results), it is difficult to substantiate who is responsible for it, and whether it was intentional; and whether institutional enquiries into research misconduct are worth pursuing if proven to be futile against existing policies, and run the risk of polarising research communities.

As clinical trials become more complex, there is increasing concern selective reporting is harder to detect, and unforeseen complexities may escalate between the oversight bodies that monitor research integrity (eg. issues of research misconduct) versus the autonomy which allow research communities to freely conduct their own research. This review seeks to demonstrate these complexities in Chronic Fatigue Syndrome (CFS).

## 2. ME/CFS

Myalgic Encephalomyelitis (ME) and CFS are not yet considered distinct diagnoses, but have been in the past (White *et al.*, 2007). The time to onset and the causes of these fatigue-like symptoms are confined to case studies (low evidence), and is still debated among experts. Nevertheless, both are diagnosed when there is an absence of fatigue-related disorders, and

36 the patient achieves a minimum threshold score for ME/CFS in at least one  
37 fatigue questionnaire eg. The Chalder Fatigue Scale; The Krupp Fatigue  
38 Severity Scale; DePaul Symptom Questionnaire etc. (Board on the Health  
39 Select Populations, 2015).

40 In the UK, Cognitive Behavioural Therapy (CBT) and Graded Exercise  
41 Therapy (GET) are proposed treatment regimens for ME/CFS to reduce the  
42 symptoms of fatigue (NICE guidelines), and are based on the results of a  
43 randomised trial (PACE: Pacing, graded Activity, and Cognitive behaviour  
44 therapy) on ME/CFS patients ( $n = 641$ ) conducted between March 2005 and  
45 November 2008. It recommends 12 to 15 sessions of Cognitive Behavioural  
46 Therapy (CBT; Fatigue:  $n = 161$ ,  $p = 0.0136$ ,  $p < 0.05$ ) over 52 weeks; or  
47 12 to 14 sessions of Graded Exercise Therapy (GET; Fatigue:  $n = 159$ ,  $p$   
48  $= 0.0013$ ,  $p < 0.05$ ) over 52 weeks (White *et. al.*, 2011). ME/CFS support  
49 groups have rejected this treatment regimen due to harms from post-exertion  
50 malaise after GET, and no improvements after CBT. Biomolecular findings  
51 further support these claims with evidence of cellular level harms detected af-  
52 ter GET (Cook *et. al.*, 2017), and have proposed biomarkers that are unique  
53 to ME/CFS (Fluge *et. al.*, 2016). The consensus is that ME/CFS is a com-  
54 plex, multi-faceted disorder that requires a multi-disciplinary approach, and  
55 aetiologies at multiple angles, such as: gut microbiota, hormonal, endocrine  
56 and immune functions. However, psychosocial angles can also offer impor-  
57 tant insights when studies are designed based on evidence. The following are  
58 lessons learnt from PACE, and recommendations on evidence-based study  
59 designs that may facilitate biomolecular studies, and potentially salvage psy-  
60 chosocial perspectives from branching off into research waste.

### 61 **3. Methods**

#### 62 *3.1. Search strategy*

63 Search terms “myalgic encephalomyelitis”, “cognitive”, “behaviour”, “gra-  
64 ded exercised therapy”, “adaptive pacing therapy”, “gene”, “cell”, “clinical-  
65 trials.gov” were automatically mined from PubMed using E-utilities on a  
66 UNIX platform with no date restriction (fig. 1: sample code). The number  
67 of articles, authors and grants were tabulated by year in Excel. All arti-  
68 cles, authors, and grants were included, and none were excluded. The search  
69 strategy collated MeSH terms for two research trends: Psychosocial versus  
70 Cellular. Articles were not scoped (included or excluded) for quality to ob-

71 serve only for research trends, and to minimise selection bias in future studies  
72 that may choose to replicate this search strategy.

```
esearch -db pubmed -query "myalgic  
encephalomyelitis  
AND clinicaltrials.gov[si]" | \  
efetch -format xml | \  
xtract -pattern Author -sep " " -element  
LastName,Initials
```

Figure 1: Sample search code in E-utilities (PubMed).

### 73 3.2. Bias appraisal

74 The author conducted a bias appraisal on three articles based on search  
75 outcomes: year and impact factor (fig. 2): 1. PACE: psychosocial interven-  
76 tions (GET, CBT, and Adaptive Pacing Therapy) to represent psychosocial  
77 trends (White *et. al.*, 2011); 2. A neural study (NS) on post-exertion malaise  
78 after GET to represent cellular trends (Cook *et. al.*, 2017). 3. A gut study  
79 (GS) on profiling gut microbial differences in ME/CFS individuals (Giloteaux  
80 *et. al.*, 2017) to also represent cellular trends. In table 1, biases were cate-  
81 gorised by: “study design”, “selection” and “measurement.” Each potential  
82 bias was rated by the author with a plus (+) or a minus sign (-) to indicate  
83 whether a study presented evidence (E) or a justification (J) for resolving a  
84 potential bias. The first two columns E and J rated PACE (White *et. al.*,  
85 2011). The next two columns E and J rated GS (Giloteaux *et. al.*, 2017);  
86 followed by ratings for NS (Cook *et. al.*, 2017). The column “Neural Study”  
87 offered an example of each rating from Cook and colleagues’ (2017) paper.  
88 The column “Potential Biases” defined these biases in public health terms.  
89 The far right column with the letters “T”, “P”, “D”, “R”: Theory (theo-  
90 ries and models used in the trial); Place (operational conduct); Recruitment  
91 (participant recruitment); Data (data practices) were collated to predict the  
92 areas of strengths and weaknesses (selective reporting) in each trial.

### 93 3.3. Statistical analysis

#### 94 1. Primary outcome

95 ME/CFS research trends: psychosocial or cellular were compared using  
96 a 2x2 contingency table to determine the strength of evidence (table 1)  
97 and justifications (table 2). Columns E and J from the bias appraisal

| PACE TRIAL                                     | STUDY DESIGN   | PACE      |           | GUT       |   | NEURAL |   | NEURAL STUDY                                       | POTENTIAL BIASES                     | AREAS |
|------------------------------------------------|----------------|-----------|-----------|-----------|---|--------|---|----------------------------------------------------|--------------------------------------|-------|
|                                                |                | E         | J         | E         | J | J      | E |                                                    |                                      |       |
| Answers clinical questions eg. PICO            |                | -         | -         | +         | + | +      | + | Evidence & justification of harms.                 | Reporting bias                       | T     |
| Type of treatment for each therapy arm         |                | +         | -         | -         | - | +      | + | Evidence & justification for intervention.         | Performance bias                     | T     |
| Treatment administered parallel or cross-modal |                | +         | -         | -         | - | -      | - | No evidence & justification for mode type.         | Performance bias                     | T     |
| Endpoints (treatment time-frame)               |                | -         | -         | +         | - | -      | + | Evidence of endpoints, no justification.           | Detection bias                       | T     |
| Pre-registered trial                           |                | +         | +         | -         | - | -      | - | Not pre-registered.                                | Reporting bias                       | T     |
| Site-specific assessment                       |                | -         | -         | +         | + | +      | + | Evidence of place & justification for place.       | Performance bias                     | P     |
| Validated clinical trial protocol              |                | -         | -         | +         | - | +      | + | Evidence & justification for protocol.             | Detection bias                       | T     |
| Validated standard operating procedures        |                | -         | -         | +         | - | +      | + | Evidence of SOP, justification for imaging.        | Performance bias                     | P     |
| Pre-trial risk assessments                     |                | -         | -         | -         | - | +      | + | Extension of previous work.                        | Performance bias                     | T     |
| Pre-trial research eg. systematic review       |                | +         | -         | +         | + | +      | + | Literature on alleviating harms.                   | Reporting bias                       | T     |
| Blinding of staff and participants             |                | -         | +         | -         | - | -      | - | No blinding.                                       | Performance bias                     | P     |
| Blinding of outcome assessment                 |                | +         | +         | -         | - | -      | - | No blinding.                                       | Detection bias                       | P     |
| <b>SELECTION</b>                               |                |           |           |           |   |        |   |                                                    |                                      |       |
| Correct population sample                      |                | +         | -         | +         | - | +      | + | Evidence & justification for characteristics.      | Misclassification (non-differential) | R     |
| Random sequence generation                     |                | +         | +         | -         | - | -      | - | No randomisation.                                  | Misclassification (differential)     | D     |
| Allocation concealment                         |                | -         | +         | -         | - | -      | - | No allocation concealment.                         | Misclassification (differential)     | P     |
| Inclusion criteria                             |                | +         | -         | -         | - | +      | + | Evidence & justification for inclusion.            | Misclassification (differential)     | R     |
| Exclusion criteria                             |                | +         | -         | -         | - | -      | + | Evidence of exclusion but no justification.        | Misclassification (non-differential) | R     |
| Programmer's institution or software           |                | -         | -         | -         | - | +      | + | Evidence of software & justification for use.      | Misclassification (differential)     | D     |
| Baseline measures                              |                | +         | -         | +         | - | +      | + | Evidence & justification for baseline measures.    | Misclassification (differential)     | R     |
| Validated patient questionnaires               |                | -         | -         | -         | - | +      | + | Evidence & justification: inter-rater reliability. | Misclassification (non-differential) | P     |
| <b>MEASUREMENT</b>                             |                |           |           |           |   |        |   |                                                    |                                      |       |
| Data collection procedure                      |                | -         | -         | +         | + | -      | - | Unspecified.                                       | Systematic error                     | P     |
| Data collection instruments                    |                | -         | -         | +         | + | +      | + | Evidence & justification for instruments.          | Systematic error                     | P     |
| Data storage                                   |                | -         | -         | +         | + | +      | + | Evidence & justification for image storage.        | Systematic error                     | P     |
| Missing data                                   |                | +         | -         | -         | - | -      | - | Unspecified.                                       | Attrition bias                       | D     |
| Sample sizes                                   |                | +         | -         | -         | - | -      | + | Evidence of sample size but no justification.      | Misclassification (non-differential) | R     |
| Power calculations                             |                | +         | -         | -         | - | -      | - | Unspecified.                                       | Misclassification (non-differential) | T     |
| Statistical methods                            |                | +         | -         | +         | - | -      | + | Evidence of methods but no justification.          | Misclassification (differential)     | T     |
| Validity                                       |                | -         | -         | -         | - | +      | + | Control group for comparison.                      | Misclassification (non-differential) | T     |
| Repeatability                                  |                | -         | -         | -         | - | -      | - | No mention of similar results to other studies.    | Misclassification (non-differential) | T     |
| Minimise confounding                           |                | -         | -         | -         | - | -      | - | Multiple questionnaires/exposures problematic.     | Misclassification (non-differential) | P     |
| Frequency of exposure                          |                | +         | -         | -         | - | -      | + | No justification for repeated exposure.            | Systematic error                     | P     |
| Frequency of outcome                           |                | -         | -         | -         | - | -      | + | Evidence of outcomes, frequency not justified.     | Random error                         | P     |
|                                                | <b>Total +</b> | <b>20</b> | <b>17</b> | <b>36</b> |   |        |   |                                                    |                                      |       |

Figure 2: Summary of bias ratings. “+” sign indicates evidence or justifications present in the trial, “-” sign indicates it was not present. Areas “T”, “P”, “D”, “R” stand for Theory, Place, Data and Recruitment to represent the potential weak areas in the trial.

98 (fig. 2) were tallied and imputed into two contingency tables, and its  
 99 proportions were compared in deriving the Odds Ratio (OR). The OR  
 100 determined the strength of evidence or justifications in resolving biases  
 101 between the two research trends. It also determined the likelihood (in  
 102 %) of evidence or justifications that were present in each research trend.  
 103 Finally, *Z* tests (two-tailed) were performed to assess whether the use  
 104 of evidence or justifications were significantly different between the two  
 105 research trends.

106 2. Secondary outcome

107 The OR (primary outcome) was applied to the total number of ME/CFS

108 grants (search strategy) declared in each research trend (psychosocial  
109 versus cellular) to compare the proportion (in %) of grants at risk of  
110 bias.

### 111 3. Software

112 All data were imputed and analysed by the author using a web-based  
113 clinical trials calculator (Centre for Clinical Research and Biostatistics,  
114 The Chinese University of Hong Kong) and verified for accuracy in  
115 another web-based, effect-size calculator (Campbell Collaboration).

| <b>Evidence</b> | <b>E+</b> | <b>E-</b> |
|-----------------|-----------|-----------|
| NS              | 21        | 11        |
| PACE            | 15        | 17        |

Table 1: 2x2 contingency table comparing evidence tallied from figure 2 (bias appraisal). NS stands for Neural Study; E+ for total plus ratings; E- for total minus ratings.

| <b>Justification</b> | <b>J+</b> | <b>J-</b> |
|----------------------|-----------|-----------|
| NS                   | 15        | 17        |
| PACE                 | 5         | 27        |

Table 2: 2x2 contingency table comparing justification tallied from figure 2 (bias appraisal). NS stands for Neural Study; J+ for total plus ratings; J- for total minus ratings.

## 116 4. Results

117 The search strategy identified 1750 published articles for psychosocial  
118 ME/CFS research and 1015 for cellular ME/CFS research between the dates  
119 1951 to 25 March 2017 (day the search was performed). All articles were  
120 included in observing research trends: psychosocial versus cellular (fig. 1).  
121 Of interest were altmetric scores scoped manually in a psychosocial trial  
122 from 2011 (PACE; White *et. al.*, 2011); a cellular study from 2016 (NS;  
123 Cook *et. al.*, 2017); and another cellular study from 2016 (GS; Giloteaux  
124 *et. al.*, 2016). All articles were selected for popularity (altmetric scores) to  
125 represent ME/CFS research trends: 1. Psychosocial: PACE trial (White *et.*  
126 *al.*, 2011); 2. Cellular: Neural study (Cook *et. al.*, 2017); 3. Cellular: Gut  
127 study (Giloteaux *et. al.*, 2016) however, did not undergo any further analysis,  
128 since pre-trial conditions (eg. serum samples) from the bias appraisal (table

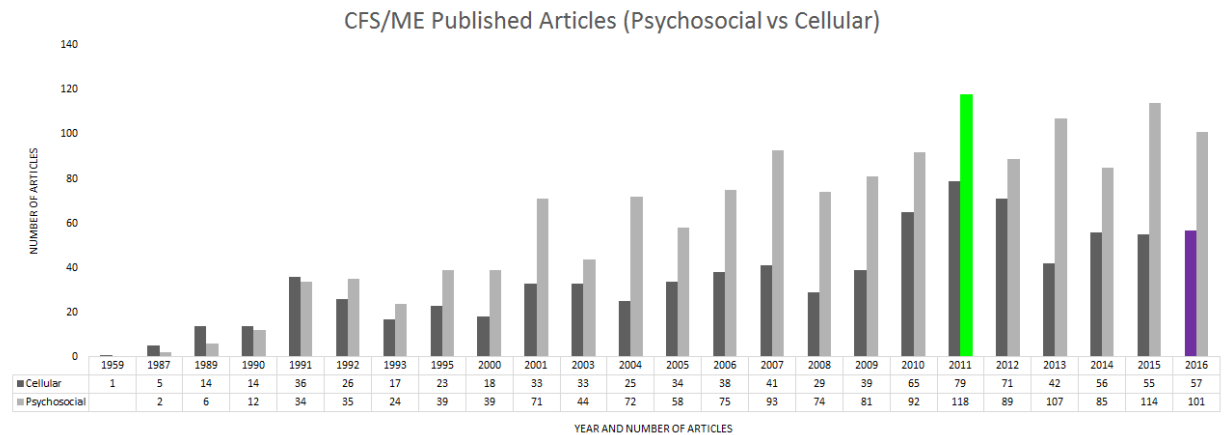

Figure 3: Search results comparing research trends: psychosocial versus cellular by year and number of published articles. The highlighted portions denote which year studies were selected for the bias appraisal.

129 1) were significantly different in scope to the other two studies *ie.* it did not  
 130 conform to an *intention to treat* experimental design.

#### 131 4.1. Risk of bias appraisal

##### 132 1. Study design

133 The study design for PACE was unclear, it was neither a randomised  
 134 controlled trial (no control group) nor a cohort study (randomised);  
 135 whereas NS had a control group and was likely a case-control study.  
 136 PACE had four treatment arms all ending in 52 weeks but these end-  
 137 points were not justified. NS also did not justify measuring neural  
 138 endpoints in 3 days. PACE registered the trial (ISRCTN54285094),  
 139 NS did not, however, it did specify the site in which the intervention  
 140 took place, whereas PACE did not. NS based the intervention off prior  
 141 work and used objective instruments (imaging scans) for measuring  
 142 outcomes of an appropriate sample size; PACE on the otherhand, re-  
 143 cruited a large sample size for an early phase trial, with no evidence of  
 144 pre-trial risk assessments on standard operating procedures and clinical  
 145 trial protocols which normally recruit small sample sizes in early phase  
 146 trials (so to limit risks on the population of interest). The study design  
 147 for GS was unclear, it did not conform to an intention to treat exper-  
 148 imental design. It had a control group which were matched to cases,



149 but it did not specify the number of specimens, patients and controls  
150 recruited by the physician, and if diagnostic tests *ie.* blood draws were  
151 done after an already confirmed ME/CFS diagnosis.

## 152 2. Selection bias

153 NS presented evidence and justifications for population sampling, base-  
154 line measures between cases and controls (patient characteristics), and  
155 validated questionnaires prior to conducting the study, but it did not  
156 conceal treatment allocations despite including a control group. This  
157 is highly problematic and can lead to selection biases consistent in  
158 case studies without a control group (low evidence). Conversely, if NS  
159 used a case-control design, it fell short of blinding and a good coverage  
160 of cases obtained from all facilities (not just one) to minimise selec-  
161 tion bias. PACE presented better clinical protocols but did not justify  
162 population sampling, sample size, selection criteria, baseline measures,  
163 questionnaires and software. GS presented very little evidence and jus-  
164 tifications in selection eg. it did not specify the number of participants  
165 and baseline measures that were relevant to sourcing serum samples.

## 166 3. Measurement bias

167 All three studies were scant on evidence and justifications for data  
168 collection, analysis and dissemination. PACE did not specify who col-  
169 lected data, the types of software used, or whether the interventions  
170 were curative (given there were no treatment endpoints) and relevant  
171 to clinical practice. NS did not specify on which specialists assessed  
172 the imaging scans and whether the imaging scans were sufficiently sen-  
173 sitive and specific in diagnosing ME/CFS. Also, there was no blind-  
174 ing (if case-control), neither did it specify the number of participants  
175 screened per questionnaire (eg. information about lost controls) which  
176 often leads to biases in underestimating the prevalence of exposure in  
177 controls, and overestimate the Odds Ratio in favour of cases (those  
178 with ME/CFS). GS presented evidence and justifications for assessing  
179 data in a controlled lab environment, but it did not specify any missing  
180 data or contaminated samples, any lab errors, confounding or overlap-  
181 ping of RNA sequences with other disease conditions. It also used a  
182 rank statistical method, an unspecified machine learning method, a  
183 sub-sampling method for validating an unspecified model, all of which  
184 were unclear and potential causes of measurement bias.



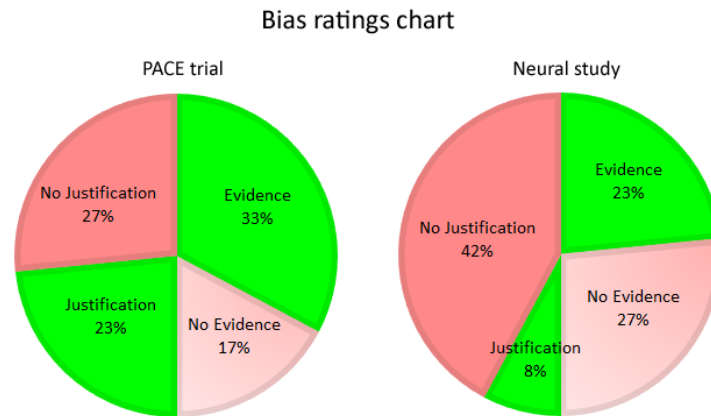

Figure 4: The proportion of bias in evidence and justifications in PACE and NS.

185 *4.2. Evidence ratings*

186 NS was twice as likely to be supported by evidence compared to PACE  
187 (OR = 2.16). NS strength of evidence was at 65.6% and for PACE 46.9%  
188 (fig. 4). However, there was no significant difference between the two studies  
189 in presenting evidence to resolve biases ( $p = 0.13$ ;  $p > 0.05$ ).

190 *4.3. Justification ratings*

191 NS was five times more likely to address biases compared to PACE (OR  
192 = 4.76). Justifications present in NS were at 46.9% and 15.6% for PACE  
193 (fig. 4). Unlike evidence, there was a significant difference in presenting  
194 justifications to resolve biases in favour of NS ( $p = 0.0095$ ;  $p < 0.05$ ).

195 *4.4. Proportion of bias*

196 Measurement bias was the most prevalent of all biases: PACE (39%) and  
197 NS (46%); followed by bias in study design: PACE (33%) and NS (29%);  
198 followed by selection bias: PACE (28%) and NS (25%) (fig. 5).

199 *4.5. Study weaknesses*

200 PACE was weak in place (32%) and theory (28%), whereas NS was weak  
201 in data (37%) and place (28%) (fig. 6).

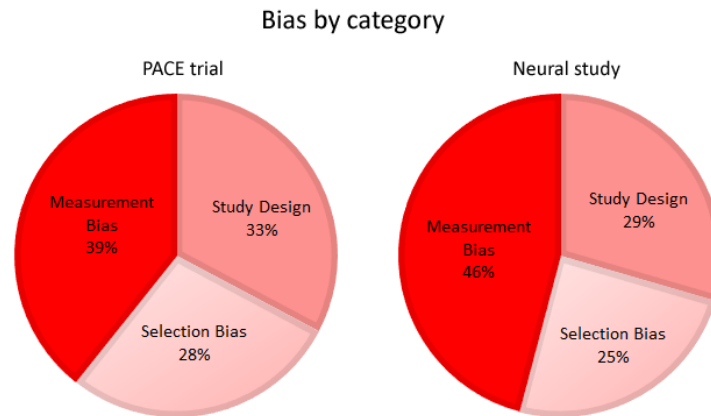

Figure 5: The proportion of bias by category in PACE and NS.

#### 202 4.6. Grants at risk of bias

203 The proportion of ME/CFS grants declared in psychosocial publications  
204 were at 56% ( $n = 722$ ; number of articles; search dates 1951 to 25 March  
205 2017) and 44% ( $n = 568$ ) for cellular. The proportion of grants biased in  
206 presenting evidence for psychosocial were at 71.8% and 28.2% for cellular  
207 (OR = 2.16; fig. 7). Grants biased in presenting justifications were at 86.4%  
208 for psychosocial and 13.6% for cellular (OR = 4.76; fig. 7).

### 209 5. Discussion

210 The results suggest psychosocial ME/CFS trials are more likely to engage  
211 in selective reporting than cellular ME/CFS trials. It confirms the concerns  
212 raised by ME/CFS groups that psychosocial interventions are harmful, and  
213 present questionable therapeutic benefits no different to a placebo (Childs *et al.*,  
214 2015; Lian & Nettleton, 2015). However, the results also suggest, cellular  
215 trials are also likely to engage in selective reporting, but its therapeutic ben-  
216 efit is difficult to assess, since no study as of yet have proposed a therapeutic  
217 agent (eg. drug) exclusively designed and marketed for treating ME/CFS  
218 (Collatz *et al.*, 2016). Brurberg and colleagues (2014) propose the need for  
219 consistency in ME/CFS research by applying a diagnostic criteria, subject  
220 to a systematic evaluation. This need to adequately define ME/CFS is a  
221 recurring consensus among researchers (Jason, Boulton & Friedberg, 2010;  
222 Nacul *et al.*, 2011; Johnston *et al.*, 2013). Some propose a re-evaluation

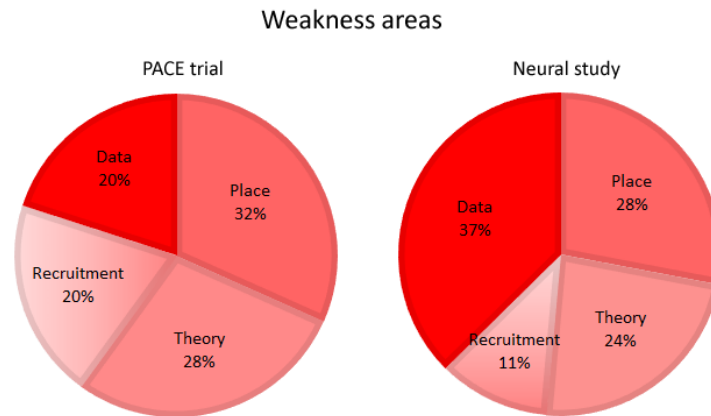

Figure 6: The proportion of weakness areas in PACE and NS.

223 of domains and criteria in existing patient reported outcome measurements  
224 (PROMs) by considering subgroups to account for heterogeneity (different  
225 populations) in comorbid conditions (eg. thyroid issues) and patient char-  
226 acteristics (eg. children) (Nacul *et. al.*, 2011; Haywood, Staniszevska &  
227 Chapman, 2012; Johnston *et. al.*, 2014; Haywood, Collin & Crawley, 2014;  
228 Hvidberg *et. al.*, 2015; Murdock *et. al.*, 2016). Others propose the need  
229 to investigate biomarkers and immune-mediated networks in developing a  
230 prophylactic agent (Fuite, Vernon & Broderick, 2008; Schlauch *et. al.*, 2016;  
231 Vega *et. al.*, 2017; Armstrong *et. al.*, 2017).

232 If in the latter, cellular trials (eg. biomarkers, immune checkpoints etc.)  
233 may benefit from designing outcomes which are sensitive and specific for  
234 clinical practice, also safe and reproducible across clinical practice. If this  
235 is not feasible, then begin with pre-clinical models (eg. animal models) and  
236 confirm risk thresholds (endpoints; safety) to deter heterogeneity (diverse  
237 or novel methods) in clinical phases from biasing the true effect. On the  
238 other hand, psychosocial studies (itemising and validating PROMs), may  
239 benefit from ensuring operational aspects (place) are well documented and  
240 archived. This ensures selective reporting in measurement- systematic errors  
241 and misclassification effects (bias towards or away from the null) can be  
242 corrected, and do not misconstrue the true effect.

243 Selective reporting is a problem in research waste, and a bias appraisal in  
244 evidence and justifications is one way to bring light of this. However, multiple  
245 appraisals should be conducted to observe for trends (reoccurring problems)

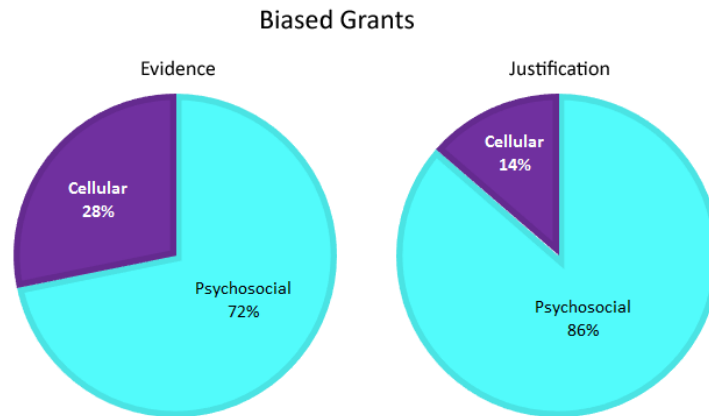

Figure 7: The proportion of bias in ME/CSF grants between research areas: psychosocial and cellular.

246 which are consistent in each research area, so that oversight bodies (eg. grant  
247 committees) do not restrict researchers from freely conducting research by  
248 enforcing a general standard across all research areas to address research  
249 waste.

#### 250 *Acknowledgements*

251 I dedicate this to ME Awareness Week 2017. I would like to thank ME  
252 groups for your passionate advocacy and for sharing your stories with me.  
253 It's truly inspiring. Thank you. A special shout out to @postersandme  
254 @johnthejack @DrFulli @MEMilitant1 @TweetTipsforME @DrSpeedyandME  
255 @MyalgicE @Lucibee @MECFStions @consent\_patient @chrisbrownofca1  
256 @FrancieSaidSo @EllieArnott @J-aneEBSmith @velogubbed

#### 257 **Supplementary material**

258 Link to figures and codes:

259 [http://www.openwetware.org/wiki/User:Sonia\\_Lee/Notebook/ResearchWasteMECFStions](http://www.openwetware.org/wiki/User:Sonia_Lee/Notebook/ResearchWasteMECFStions)

260 Link to slides:

261 [https://figshare.com/articles/PACE\\_Trial\\_Critical\\_Appraisal\\_slides\\_/4685074](https://figshare.com/articles/PACE_Trial_Critical_Appraisal_slides_/4685074)

#### **References**

Armstrong, C. W., McGregor, N. R., Lewis, D. P., Butt, H. L., & Gooley, P.  
R. *The association of fecal microbiota and fecal, blood serum and urine*

- metabolites in myalgic encephalomyelitis/chronic fatigue syndrome.*, *Metabolomics*, 13(1), 1-13, doi:10.1007/s11306-016-1145-z, 2017.
- Brurberg, K. G., Fønhus, M. S., Larun, L., Flottorp, S., & Malterud, K. *Case definitions for chronic fatigue syndrome/myalgic encephalomyelitis (CFS/ME): A systematic review.*, *BMJ Open*, 4(2) e003973, doi:10.1136/bmjopen-2013-003973, 2014.
- Campbell Collaboration *This is a web-based effect-size calculator.*, Retrieved May 01, 2017 from <https://www.campbellcollaboration.org/effect-size-calculator.html>
- Childs, N., Robinson, L., Chowdhury, S., Ogden, C., & Newton, J. L. *Consulting patients in setting priorities in myalgic encephalomyelitis (M.E.) research: Findings from a national on-line survey.*, *Research Involvement and Engagement*, 1(1), doi:10.1186/s40900-015-0011-x, 2015.
- Collatz, A., Johnston, S. C., Staines, D. R., & Marshall-Gradisnik, S. M. *A systematic review of drug therapies for chronic fatigue Syndrome/Myalgic encephalomyelitis.*, *Clinical Therapeutics*, 38(6), 1263-1271.e., doi:10.1016/j.clinthera.2016.04.038, 2016.
- Cook, D. B., Light, A. R., Light, K. C., Broderick, G., Shields, M. R., Dougherty, R. J., . . . Vernon, S. D. *Neural consequences of post-exertion malaise in myalgic Encephalomyelitis/Chronic fatigue syndrome.*, *Brain, Behavior, and Immunity*, doi:10.1016/j.bbi.2017.02.009, 2017.
- Crawley, E., Mills, N., Hollingworth, W., Deans, Z., Sterne, J. A., Donovan, J. L., . . . Montgomery, A. *Comparing specialist medical care with specialist medical care plus the lightning process for chronic fatigue syndrome or myalgic encephalomyelitis (CFS/ME): Study protocol for a randomised controlled trial (SMILE trial).*, *Trials*, 14(1), 444-444, doi:10.1186/1745-6215-14-444, 2013.
- de Vega, W. C., Herrera, S., Vernon, S. D., & McGowan, P. O. *Epigenetic modifications and glucocorticoid sensitivity in myalgic Encephalomyelitis/Chronic fatigue syndrome (ME/CFS).*, *BMC Medical Genomics*, 10(1), doi:10.1186/s12920-017-0248-3, 2017.
- Fluge, Ø, Mella, O., Bruland, O., Risa, K., Dyrstad, S. E., Alme, K., . . . Tronstad, K. J. *Metabolic profiling indicates impaired pyruvate dehydrogenase function in myalgic encephalopathy/chronic fatigue syndrome.*, *JCI Insight*, 1(21), doi:10.1172/jci.insight.89376, 2016.
- Fuite, J., Vernon, S. D., & Broderick, G. *Neuroendocrine and immune net-*

- work re-modeling in chronic fatigue syndrome: An exploratory analysis.*, Genomics, 92(6), 393-399, doi:10.1016/j.ygeno.2008.08.008, 2008.
- Haywood, K. L., Collin, S. M., & Crawley, E. *Assessing severity of illness and outcomes of treatment in children with chronic fatigue Syndrome/Myalgic encephalomyelitis (CFS/ME): A systematic review of patient-reported outcome measures (PROMs): Systematic review of outcome measures in children with CFS/ME.*, Child: Care, Health and Development, 40(6), 806-824, doi:10.1111/cch.12135, 2014.
- Haywood, K. L., Staniszevska, S., & Chapman, S. *Quality and acceptability of patient-reported outcome measures used in chronic fatigue syndrome/myalgic encephalomyelitis (CFS/ME): A systematic review.*, Quality of Life Research, 21(1), 35-52, doi:10.1007/s11136-011-9921-8, 2012.
- Hvidberg, M. F., Brinth, L. S., Olesen, A. V., Petersen, K. D., & Ehlers, L. *The health-related quality of life for patients with myalgic encephalomyelitis / chronic fatigue syndrome (ME/CFS): E0132421.*, PLoS One, 10(7), doi:10.1371/journal.pone.0132421, 2015.
- Jason, L. A., Boulton, A., Porter, N. S., Jessen, T., Njoku, M. G., & Friedberg, F. *Classification of myalgic Encephalomyelitis/Chronic fatigue syndrome by types of fatigue.*, Behavioral Medicine, 36(1), 24-31, doi:10.1080/08964280903521370, 2010.
- Johnston, S., Brenu, E. W., Staines, D. R., & Marshall-Gradisnik, S. *The adoption of chronic fatigue syndrome/myalgic encephalomyelitis case definitions to assess prevalence: A systematic review.*, Annals of Epidemiology, 23(6), 371, doi:10.1016/j.annepidem.2013.04.003, 2013.
- Johnston, S., Brenu, E. W., Staines, D., & Marshall-Gradisnik, S. *The prevalence of chronic fatigue syndrome/ myalgic encephalomyelitis: A meta-analysis.*, Clinical Epidemiology, 5, 105-110, doi:10.2147/CLEP.S39876, 2013.
- Johnston, S. C., Brenu, E. W., Hardcastle, S. L., Huth, T. K., Staines, D. R., & Marshall-Gradisnik, S. M. *A comparison of health status in patients meeting alternative definitions for chronic fatigue syndrome/myalgic encephalomyelitis.*, Health and Quality of Life Outcomes, 12(1), 64, doi:10.1186/1477-7525-12-64, 2014.
- Kans, J. *Entrez Direct: E-utilities on the UNIX Command Line.*, Retrieved May 01, 2017 from <https://www.ncbi.nlm.nih.gov/books/NBK179288/>
- Kasenda, B., von Elm, E., You, J., Blmlle, A., Tomonaga, Y., Sac-cilotto, R., . . . Briel, M. *Prevalence, characteristics, and publica-*

- tion of discontinued randomized trials.*, *Jama*, 311(10), 1045-1052, doi:10.1001/jama.2014.1361, 2014.
- Lian, O. S., & Nettleton, S. *United we stand: Framing myalgic encephalomyelitis in a virtual symbolic community.*, *Qualitative Health Research*, 25(10), 1383-1394, doi:10.1177/1049732314562893, 2014;2015.
- Murdock, K. W., Wang, X. S., Shi, Q., Cleeland, C. S., Fagundes, C. P., & Vernon, S. D. *The utility of patient-reported outcome measures among patients with myalgic encephalomyelitis/chronic fatigue syndrome.*, *Quality of Life Research*, 26(4), 913, doi:10.1007/s11136-016-1406-3, 2016;2017.
- Nacul, L. C., Lacerda, E. M., Champion, P., Pheby, D., Drachler, M. d. L., Leite, J. C., . . . Molokhia, M. *The functional status and well being of people with myalgic encephalomyelitis/chronic fatigue syndrome and their carers.*, *BMC Public Health*, 11(1), 402-402, doi:10.1186/1471-2458-11-402, 2011.
- Nacul, L. C., Lacerda, E. M., Pheby, D., Champion, P., Molokhia, M., Fayyaz, S., . . . Drachler, M. L. *Prevalence of myalgic encephalomyelitis/chronic fatigue syndrome (ME/CFS) in three regions of england: A repeated cross-sectional study in primary care.*, *BMC Medicine*, 9(1), 91, doi:10.1186/1741-7015-9-91, 2011.
- NICE. *Chronic fatigue syndrome/myalgic encephalomyelitis (or encephalopathy): diagnosis and management.*, Retrieved May 01, 2017, from <https://www.nice.org.uk/guidance/cg53/>
- Schlauch, K. A., Khaiboullina, S. F., De Meirleir, K. L., Rawat, S., Peterleit, J., Rizvanov, A. A., . . . Lombardi, V. C. *Genome-wide association analysis identifies genetic variations in subjects with myalgic encephalomyelitis/chronic fatigue syndrome.*, *Translational Psychiatry*, 6, e730, doi:10.1038/tp.2015.208, 2016.
- Schmucker, C., Schell, L. K., Portalupi, S., Oeller, P., Cabrera, L., Bassler, D., . . . on behalf of the OPEN consortium. *Extent of non-publication in cohorts of studies approved by research ethics committees or included in trial registries.*, *PloS One*, 9(12), e114023, doi:10.1371/journal.pone.0114023, 2014.
- The Centre for Clinical Research and Biostatistics (CCRB). The Chinese University of Hong Kong. Retrieved May 01, 2017 from <https://www2.ccrb.cuhk.edu.hk/stat/Other.htm>
- Van Den Bogert, Cornelis A, Souverein, P. C., Brekelmans, C. T. M., Janssen,



- S. W. J., Van Hunnik, M., Koter, G. H., . . . Bouter, L. M. *Occurrence and determinants of selective reporting of clinical drug trials : Design of an inception cohort study.*, *Jama*, 311(10), 1045-1052, doi:10.1136/bmjopen-2015-007827, 2014.
- White, P., Armstrong, G., Murphy, M., Spencer, P., & Moss, J. *Chronic fatigue syndrome or myalgic encephalomyelitis.*, *BMJ: British Medical Journal*, 335(7617), 411-412, doi:10.1136/bmj.39316.472361.80, 2007.
- White, P., Goldsmith, K., Johnson, A., Potts, L., Walwyn, R., DeCesare, J., . . . *Comparison of adaptive pacing therapy, cognitive behaviour therapy, graded exercise therapy, and specialist medical care for chronic fatigue syndrome (PACE): A randomised trial.*, *The Lancet*, 377(9768), 823-836, doi:10.1016/S0140-6736(11)60096-2, 2011.
